# Supplementary material for: Thrombin Generation and Platelet Function in ICU Patients Undergoing CVVHD Using Regional Citrate Anticoagulation
Source: Frontiers journal article supplement (doi:10.3389/fmed.2021.680540), 2021-06-14

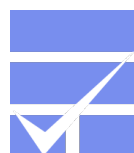

# CONSORT

TRANSPARENT REPORTING of TRIALS

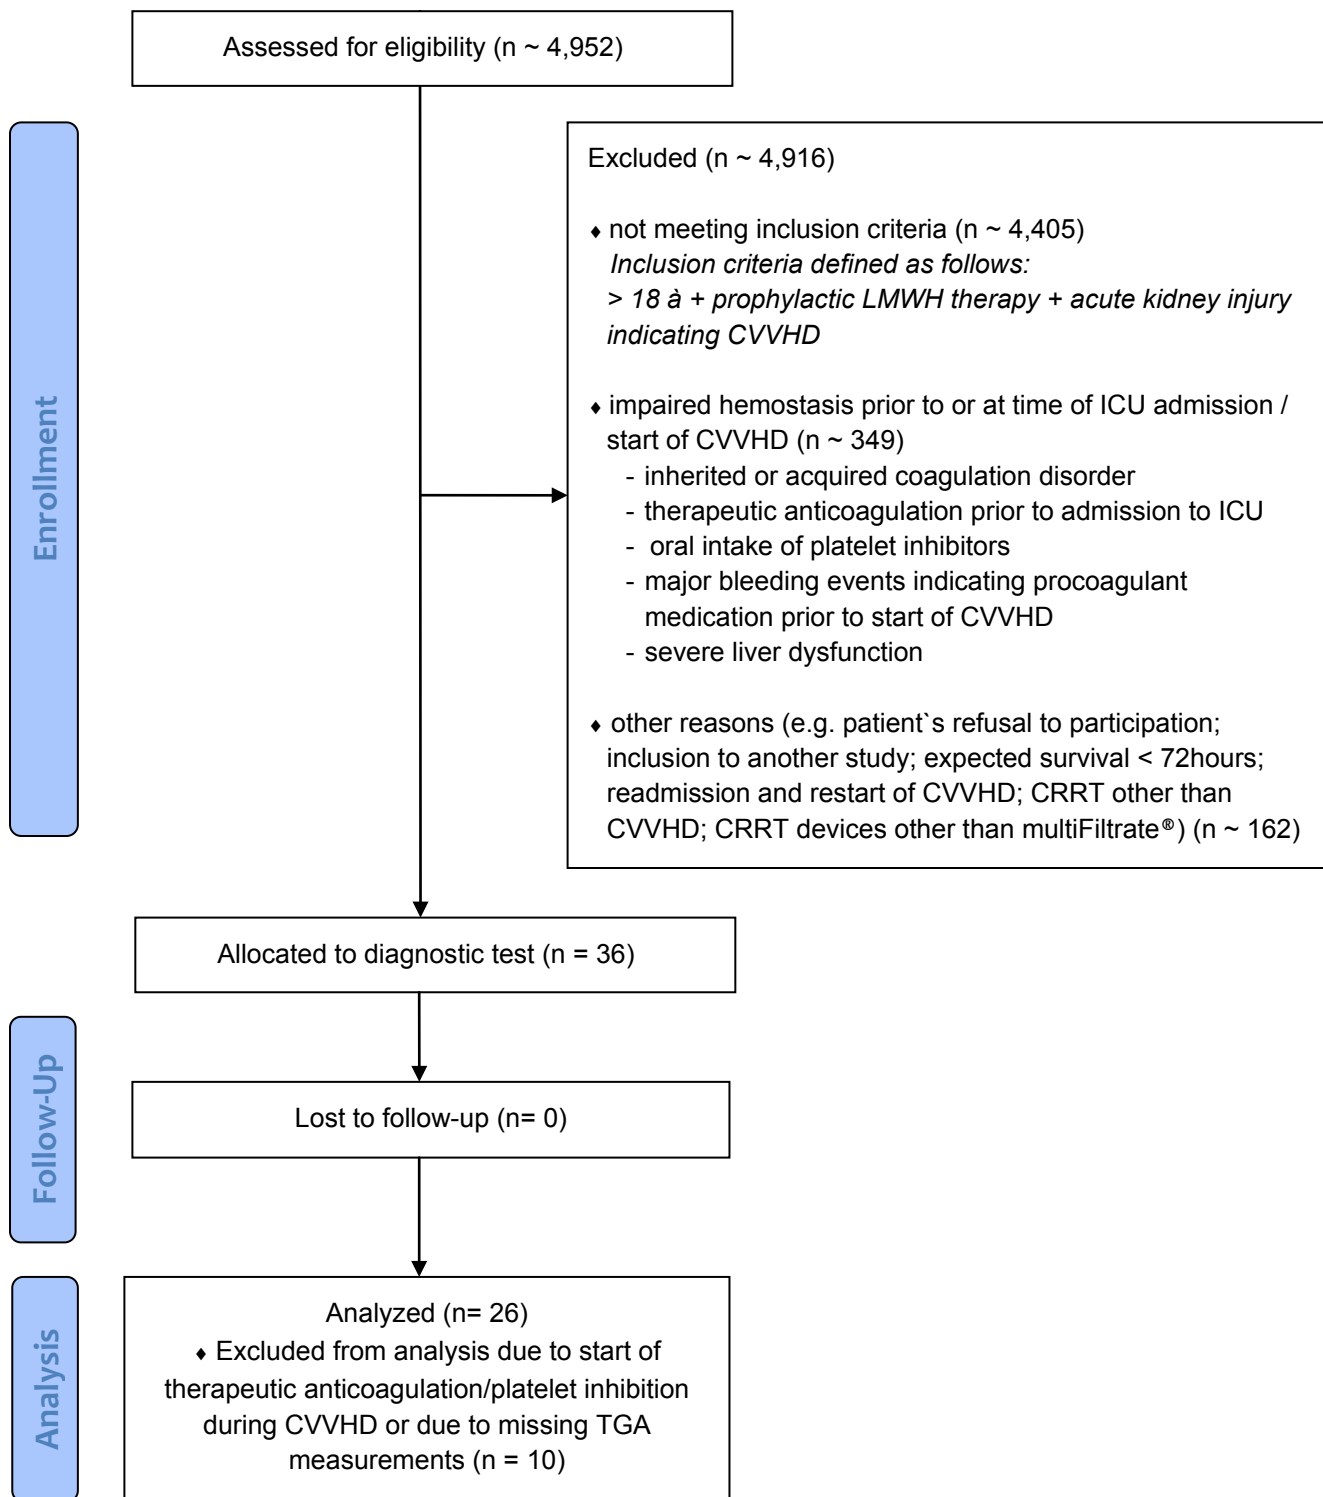

Supplement: Data_Sheet_1.pdf [file Data_Sheet_1.pdf]
